# Supplementary material for: Experimental drought and soil amendments affect grassland above- and belowground vegetation but not soil carbon stocks
Source: Copernicus journal article supplement (doi:10.5194/soil-11-233-2025), 2025-02-11
Supplement: Supplementary file 1 [file soil-11-233-2025-supplement.pdf]

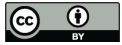

*Supplement of*

## **Experimental drought and soil amendments affect grassland above- and belowground vegetation but not soil carbon stocks**

**Daniela Guasconi et al.**

*Correspondence to:* Daniela Guasconi ([daniela.guasconi@natgeo.su.se](mailto:daniela.guasconi@natgeo.su.se))

The copyright of individual parts of the supplement might differ from the article licence.

# Supplements

## Tables

Table S1. Climate, coordinates and soil texture for the study locations

General area:

- Mean annual precipitation 1991-2020: 500 mm
- Mean annual temperature 1991-2020: 6.5°C (Swedish Meteorological and Hydrological Institute, 2022)
- masl 50 m
- distance Ämtvik-Tovetorp: ~5 km
- distance high elevation site – low elevation site: 50 m, 6 m elevation difference
- distance to the forest edge: 6–20 m in Ämtvik, 50–90 m in Tovetorp

| Location      | Coordinates         | Clay (%) | Silt (%) | Sand (%) |
|---------------|---------------------|----------|----------|----------|
| Tovetorp High | 58.9458 N 17.1493 E | 44,0     | 40,2     | 15,8     |
| Tovetorp Low  | 58.9452 N 17.1494 E | 28,3     | 41,7     | 30,0     |
| Ämtvik High   | 58.9599 N 17.0939 E | 26,3     | 58,7     | 15,0     |
| Ämtvik Low    | 58.9587 N 17.0941 E | 29,3     | 38,3     | 32,3     |

Table S2. Monthly precipitation data 2018-2022

| Year | Month     | Total precipitation (mm) | Year | Month     | Total precipitation (mm) |
|------|-----------|--------------------------|------|-----------|--------------------------|
| 2018 | January   | 62.0                     | 2020 | July      | 37.0                     |
| 2018 | February  | 12.8                     | 2020 | August    | 11.6                     |
| 2018 | March     | 11.2                     | 2020 | September | 41.6                     |
| 2018 | April     | 21.2                     | 2020 | October   | 90.4                     |
| 2018 | May       | 12.8                     | 2020 | November  | 22.8                     |
| 2018 | June      | 20.0                     | 2020 | December  | 89.8                     |
| 2018 | July      | 8.8                      | 2021 | January   | 46.0                     |
| 2018 | August    | 14.0                     | 2021 | February  | 4.4                      |
| 2018 | September | 14.8                     | 2021 | March     | 15.8                     |
| 2018 | October   | 13.2                     | 2021 | April     | 12.4                     |
| 2018 | November  | 17.6                     | 2021 | May       | 106.8                    |
| 2018 | December  | 36.2                     | 2021 | June      | 28.4                     |
| 2019 | January   | 11.2                     | 2021 | July      | 34.8                     |
| 2019 | February  | 27.6                     | 2021 | August    | 67.8                     |
| 2019 | March     | 54.2                     | 2021 | September | 23.0                     |
| 2019 | April     | 0.0                      | 2021 | October   | 28.6                     |
| 2019 | May       | 45.8                     | 2021 | November  | 30.4                     |
| 2019 | June      | 27.4                     | 2021 | December  | 23.4                     |
| 2019 | July      | 34.8                     | 2022 | January   | 33.6                     |
| 2019 | August    | 49.2                     | 2022 | February  | 51.6                     |
| 2019 | September | 30.4                     | 2022 | March     | 0.0                      |
| 2019 | October   | 45.6                     | 2022 | April     | 24.2                     |
| 2019 | November  | 46.4                     | 2022 | May       | 30.8                     |
| 2019 | December  | 72.2                     | 2022 | June      | 10.8                     |
| 2020 | January   | 22.0                     | 2022 | July      | 50.8                     |
| 2020 | February  | 23.2                     | 2022 | August    | 39.2                     |
| 2020 | March     | 44.2                     | 2022 | September | 29.4                     |
| 2020 | April     | 12.6                     | 2022 | October   | 32.2                     |
| 2020 | May       | 20.2                     | 2022 | November  | 37.2                     |
| 2020 | June      | 19.4                     | 2022 | December  | 21.8                     |

Table S3. pH and nutrients (P, K, Mg, Ca) in the soil samples

| plot | site          | treatment | year | pH  | P_AL<br>(mg/100g) | K_AL<br>(mg/100g) | Mg_AL<br>(mg/100g) | Ca_AL<br>(mg/100g) |
|------|---------------|-----------|------|-----|-------------------|-------------------|--------------------|--------------------|
| 1    | Tovetorp high | control   | 2019 | 5,9 | 7,0               | 13,2              | 26,8               | 121,6              |
| 2    | Tovetorp high | control   | 2019 | 5,9 | 7,8               | 15,1              | 23,2               | 116,5              |
| 3    | Tovetorp high | control   | 2019 | 5,9 | 8,0               | 16,0              | 23,6               | 120,7              |
| 4    | Tovetorp high | control   | 2019 | 5,9 | 6,5               | 15,8              | 21,7               | 109,8              |
| 5    | Tovetorp high | control   | 2019 | 6,0 | 8,4               | 17,6              | 23,1               | 122,4              |
| 6    | Tovetorp high | control   | 2019 | 5,8 | 7,7               | 16,2              | 20,0               | 117,4              |
| 7    | Tovetorp high | control   | 2019 | 5,8 | 6,9               | 16,0              | 24,7               | 118,4              |
| 8    | Tovetorp high | control   | 2019 | 6,0 | 7,0               | 17,7              | 24,8               | 121,5              |
| 9    | Tovetorp high | control   | 2019 | 5,9 | 6,2               | 22,4              | 21,8               | 111,0              |
| 10   | Tovetorp high | control   | 2019 | 5,8 | 6,8               | 20,8              | 19,6               | 104,5              |
| 11   | Tovetorp high | control   | 2019 | 6,0 | 5,4               | 23,1              | 22,6               | 119,1              |
| 12   | Tovetorp high | control   | 2019 | 5,9 | 5,8               | 23,1              | 16,9               | 103,1              |
| 13   | Tovetorp low  | control   | 2019 | 5,3 | 13,6              | 7,8               | 15,6               | 87,3               |
| 14   | Tovetorp low  | control   | 2019 | 5,5 | 10,4              | 9,5               | 16,8               | 90,6               |
| 15   | Tovetorp low  | control   | 2019 | 5,5 | 12,8              | 12,8              | 17,4               | 102,4              |
| 16   | Tovetorp low  | control   | 2019 | 5,6 | 14,4              | 12,0              | 17,8               | 109,5              |
| 17   | Tovetorp low  | control   | 2019 | 5,6 | 11,0              | 9,9               | 18,7               | 110,2              |
| 18   | Tovetorp low  | control   | 2019 | 5,5 | 10,9              | 10,1              | 18,7               | 111,5              |
| 19   | Tovetorp low  | control   | 2019 | 5,4 | 9,3               | 10,5              | 21,6               | 94,8               |
| 20   | Tovetorp low  | control   | 2019 | 5,5 | 11,3              | 8,7               | 18,9               | 100,0              |
| 21   | Tovetorp low  | control   | 2019 | 5,5 | 11,4              | 11,2              | 19,0               | 111,5              |
| 22   | Tovetorp low  | control   | 2019 | 5,5 | 11,5              | 11,8              | 21,2               | 117,7              |
| 23   | Tovetorp low  | control   | 2019 | 5,5 | 9,1               | 10,2              | 18,1               | 92,4               |
| 24   | Tovetorp low  | control   | 2019 | 5,6 | 14,2              | 6,8               | 19,1               | 115,8              |
| 25   | Ämtvik high   | control   | 2019 | 5,7 | 1,2               | 6,4               | 36,2               | 99,3               |
| 26   | Ämtvik high   | control   | 2019 | 5,6 | 1,4               | 7,0               | 27,6               | 83,3               |
| 27   | Ämtvik high   | control   | 2019 | 5,5 | 1,6               | 6,2               | 20,8               | 87,9               |
| 28   | Ämtvik high   | control   | 2019 | 5,6 | 1,0               | 4,8               | 13,6               | 61,6               |
| 29   | Ämtvik high   | control   | 2019 | 5,7 | 1,4               | 8,8               | 30,1               | 100,2              |
| 30   | Ämtvik high   | control   | 2019 | 5,4 | 1,6               | 7,5               | 23,4               | 84,5               |

|    |               |                   |      |     |      |      |      |       |
|----|---------------|-------------------|------|-----|------|------|------|-------|
| 31 | Ämtvik high   | control           | 2019 | 5,5 | 1,3  | 9,3  | 23,6 | 82,2  |
| 32 | Ämtvik high   | control           | 2019 | 5,6 | 1,7  | 12,9 | 28,6 | 89,3  |
| 33 | Ämtvik high   | control           | 2019 | 5,5 | 1,5  | 8,7  | 24,8 | 86,6  |
| 34 | Ämtvik high   | control           | 2019 | 5,6 | 1,4  | 11,3 | 26,9 | 85,8  |
| 35 | Ämtvik high   | control           | 2019 | 5,7 | 1,4  | 13,6 | 23,2 | 76,8  |
| 36 | Ämtvik high   | control           | 2019 | 5,5 | 1,2  | 8,2  | 16,9 | 64,3  |
| 37 | Ämtvik low    | control           | 2019 | 5,7 | 1,2  | 20,8 | 19,9 | 63,8  |
| 38 | Ämtvik low    | control           | 2019 | 5,8 | 1,5  | 17,8 | 22,8 | 80,3  |
| 39 | Ämtvik low    | control           | 2019 | 5,9 | 1,1  | 10,6 | 17,8 | 73,8  |
| 40 | Ämtvik low    | control           | 2019 | 5,7 | 1,3  | 9,3  | 17,8 | 64,9  |
| 41 | Ämtvik low    | control           | 2019 | 5,6 | 1,1  | 10,1 | 31,7 | 84,1  |
| 42 | Ämtvik low    | control           | 2019 | 6,0 | 1,1  | 12,2 | 17,8 | 70,3  |
| 43 | Ämtvik low    | control           | 2019 | 5,7 | 1,2  | 6,8  | 16,3 | 62,0  |
| 44 | Ämtvik low    | control           | 2019 | 5,6 | 1,6  | 10,2 | 19,7 | 75,2  |
| 45 | Ämtvik low    | control           | 2019 | 5,6 | 1,4  | 10,0 | 19,4 | 78,9  |
| 46 | Ämtvik low    | control           | 2019 | 5,8 | 1,0  | 7,4  | 13,5 | 51,3  |
| 47 | Ämtvik low    | control           | 2019 | 6,0 | 11,9 | 43,3 | 28,1 | 144,0 |
| 48 | Ämtvik low    | control           | 2019 | 5,7 | 1,0  | 5,3  | 14,0 | 55,6  |
| 1  | Tovetorp high | drought           | 2022 | 6,1 | 6,7  | 16,0 | 28,0 | 136,2 |
| 2  | Tovetorp high | drought x compost | 2022 | 6,2 | 8,5  | 16,0 | 26,4 | 131,4 |
| 3  | Tovetorp high | control           | 2022 | 6,0 | 6,5  | 14,9 | 21,5 | 113,4 |
| 4  | Tovetorp high | compost           | 2022 | 6,2 | 7,2  | 17,3 | 26,4 | 127,6 |
| 5  | Tovetorp high | drought           | 2022 | 6,0 | 7,6  | 14,9 | 22,1 | 121,3 |
| 6  | Tovetorp high | drought x compost | 2022 | 6,0 | 4,2  | 11,9 | 17,0 | 105,7 |
| 7  | Tovetorp high | control           | 2022 | 6,0 | 9,4  | 14,9 | 26,5 | 128,2 |
| 8  | Tovetorp high | compost           | 2022 | 6,0 | 7,0  | 14,6 | 24,5 | 124,4 |
| 9  | Tovetorp high | drought           | 2022 | 5,9 | 6,4  | 15,4 | 20,6 | 114,6 |
| 10 | Tovetorp high | drought x compost | 2022 | 6,0 | 4,9  | 16,0 | 22,1 | 117,5 |
| 11 | Tovetorp high | control           | 2022 | 6,1 | 6,0  | 15,4 | 22,6 | 120,3 |
| 12 | Tovetorp high | compost           | 2022 | 6,1 | 6,1  | 17,2 | 17,2 | 105,3 |
| 13 | Tovetorp low  | drought           | 2022 | 5,8 | 9,5  | 6,7  | 14,4 | 80,8  |
| 14 | Tovetorp low  | drought x compost | 2022 | 5,7 | 12,0 | 7,4  | 13,2 | 77,0  |
| 15 | Tovetorp low  | drought x compost | 2022 | 5,8 | 12,9 | 9,8  | 16,1 | 97,6  |

|    |              |                   |      |     |      |      |      |       |
|----|--------------|-------------------|------|-----|------|------|------|-------|
| 16 | Tovetorp low | drought           | 2022 | 5,6 | 9,3  | 6,1  | 15,1 | 98,0  |
| 17 | Tovetorp low | compost           | 2022 | 5,7 | 14,7 | 10,8 | 17,1 | 106,5 |
| 18 | Tovetorp low | control           | 2022 | 5,6 | 11,0 | 9,8  | 17,8 | 108,2 |
| 19 | Tovetorp low | control           | 2022 | 5,5 | 9,1  | 15,3 | 25,2 | 131,8 |
| 20 | Tovetorp low | compost           | 2022 | 5,6 | 8,6  | 9,8  | 18,4 | 92,8  |
| 21 | Tovetorp low | drought           | 2022 | 5,6 | 9,9  | 7,5  | 16,3 | 94,3  |
| 22 | Tovetorp low | drought x compost | 2022 | 5,6 | 12,1 | 8,3  | 19,0 | 108,1 |
| 23 | Tovetorp low | control           | 2022 | 5,9 | 11,9 | 7,2  | 16,4 | 101,8 |
| 24 | Tovetorp low | compost           | 2022 | 5,6 | 10,0 | 6,5  | 16,5 | 106,2 |
| 25 | Ämtvik high  | drought x compost | 2022 | 6,0 | 1,1  | 8,0  | 32,3 | 114,9 |
| 26 | Ämtvik high  | drought           | 2022 | 6,0 | 1,5  | 9,9  | 20,9 | 61,3  |
| 27 | Ämtvik high  | drought x compost | 2022 | 5,8 | 1,3  | 5,0  | 12,7 | 57,6  |
| 28 | Ämtvik high  | drought           | 2022 | 5,7 | 1,2  | 4,9  | 12,6 | 57,2  |
| 29 | Ämtvik high  | control           | 2022 | 5,8 | 1,1  | 6,7  | 20,5 | 75,8  |
| 30 | Ämtvik high  | compost           | 2022 | 5,9 | 1,5  | 17,7 | 26,9 | 81,8  |
| 31 | Ämtvik high  | control           | 2022 | 5,9 | 1,0  | 5,6  | 30,0 | 72,3  |
| 32 | Ämtvik high  | compost           | 2022 | 5,7 | 1,3  | 6,3  | 16,4 | 62,7  |
| 33 | Ämtvik high  | drought           | 2022 | 5,9 | 0,9  | 5,9  | 28,8 | 88,4  |
| 34 | Ämtvik high  | drought x compost | 2022 | 6,0 | 1,1  | 11,1 | 25,5 | 73,4  |
| 35 | Ämtvik high  | compost           | 2022 | 5,8 | 1,3  | 7,1  | 24,6 | 77,8  |
| 36 | Ämtvik high  | control           | 2022 | 6,0 | 0,5  | 5,7  | 15,3 | 43,0  |
| 37 | Ämtvik low   | control           | 2022 | 5,9 | 1,0  | 6,5  | 26,1 | 59,3  |
| 38 | Ämtvik low   | compost           | 2022 | 5,8 | 1,0  | 6,5  | 18,5 | 62,0  |
| 39 | Ämtvik low   | drought           | 2022 | 5,6 | 1,3  | 9,4  | 14,1 | 58,9  |
| 40 | Ämtvik low   | drought x compost | 2022 | 5,6 | 1,3  | 6,2  | 16,6 | 54,5  |
| 41 | Ämtvik low   | compost           | 2022 | 5,9 | 1,8  | 8,3  | 16,0 | 61,4  |
| 42 | Ämtvik low   | control           | 2022 | 6,1 | 1,3  | 11,4 | 20,4 | 70,9  |
| 43 | Ämtvik low   | drought x compost | 2022 | 5,7 | 1,6  | 8,1  | 32,0 | 84,7  |
| 44 | Ämtvik low   | drought           | 2022 | 5,5 | 1,2  | 9,6  | 14,8 | 56,2  |
| 45 | Ämtvik low   | compost           | 2022 | 5,8 | 3,0  | 6,9  | 14,7 | 61,7  |
| 46 | Ämtvik low   | control           | 2022 | 5,7 | 1,6  | 6,3  | 15,3 | 58,1  |
| 47 | Ämtvik low   | drought           | 2022 | 5,7 | 1,3  | 4,5  | 16,6 | 57,6  |
| 48 | Ämtvik low   | drought x compost | 2022 | 5,8 | 1,1  | 5,2  | 12,7 | 50,1  |

Table S4. Relative abundance of grasses, forbs and legumes in 2019 (as percentage of total dry weight of live plant biomass excluding mosses, average values per site, n = 6):

| Site                      | % grasses<br>(n = 6) | % forbs<br>(n = 6) | % legumes<br>(n = 6) | Average biomass increase (g m <sup>2</sup> ) 2019-<br>2022 (compost-treated plots, n = 3) |
|---------------------------|----------------------|--------------------|----------------------|-------------------------------------------------------------------------------------------|
| Tovetorp - High elevation | 66,4                 | 23,9               | 9,7                  | 420,3                                                                                     |
| Tovetorp - Low elevation  | 88,4                 | 10,6               | 1,0                  | 581,7                                                                                     |
| Ämtvik - High elevation   | 66,0                 | 26,2               | 7,8                  | 234,7                                                                                     |
| Ämtvik - Low elevation    | 54,8                 | 34,6               | 10,5                 | 193,7                                                                                     |

Table S5. Details of the sampling design

|                                         | 2019                                                         | 2022                                                         |
|-----------------------------------------|--------------------------------------------------------------|--------------------------------------------------------------|
| Soil bulk density                       | 3 cores per site (12 cores in total)                         | 1 core per plot (48 cores in total)                          |
| Total C and N and $\delta^{13}\text{C}$ | 6 cores per site (24 cores in total)                         | 1 core per plot (48 cores in total)                          |
| pH                                      | 0-10 cm, 10-20 cm, 20-30 cm and 40-50 cm. All plots (n = 48) | 0-10 cm, 10-20 cm, 20-30 cm and 40-50 cm. All plots (n = 48) |
| P, Ca, Mg, K                            | 0-30 cm. All plots (n = 48)                                  | 10-20 cm. All plots (n = 48)                                 |
| Soil moisture                           | All plots (n = 48)                                           | All plots (n = 48)                                           |
| Root biomass                            | All plots (n = 48)                                           | All plots (n = 48)                                           |
| Aboveground biomass                     | All plots (n = 48)                                           | All plots (n = 48)                                           |



Table S6. Effect sizes (Cohen's d) of the differences between sites, years and treatments for each soil depth. Effect sizes can be regarded as small (absolute value <0.2), medium (0.2-0.8) or large (> 0.8, bold).

| depth    | factor            | Tot C        | C stock      | Bulk density | Root biomass | Aboveground biomass |
|----------|-------------------|--------------|--------------|--------------|--------------|---------------------|
| 0–5 cm   |                   | 0.21         | 0.10         | -0.40        | -0.32        |                     |
| 0–15 cm  | grassland         | 0.64         | 0.58         | -0.36        | -0.24        | -0.17               |
| 15–30 cm |                   | -0.67        | <b>-0.89</b> | -0.01        | 1.00         |                     |
| 30–45 cm |                   | -0.53        | -0.51        | 0.53         | 0.28         |                     |
| 0–5 cm   |                   | <b>-1.03</b> | <b>-1.12</b> | -0.06        | -0.44        |                     |
| 0–15 cm  | catenary position | -0.61        | -0.47        | <b>1.09</b>  | <b>-0.86</b> |                     |
| 15–30 cm |                   | -0.48        | -0.46        | -0.68        | -0.64        | 0.14                |
| 30–45 cm |                   | <b>-0.96</b> | <b>-0.99</b> | 0.62         | 0.27         |                     |
| 0–5 cm   |                   | 0.34         | -0.08        | <b>-0.81</b> | 0.07         |                     |
| 0–15 cm  | year              | <b>0.96</b>  | <b>1.25</b>  | 0.06         | <b>1.27</b>  | <b>-1.62</b>        |
| 15–30 cm |                   | 0.21         | 0.23         | -0.19        | 0.49         |                     |
| 30–45 cm |                   | 0.30         | 0.13         | <b>-1.41</b> | <b>0.87</b>  |                     |
| 0–5 cm   |                   | 0.52         | 0.26         | -0.79        | -0.08        |                     |
| 0–15 cm  | compost           | -0.02        | 0.26         | 0.40         | 0.14         | <b>1.13</b>         |
| 15–30 cm |                   | -0.13        | -0.18        | 0.50         | -0.33        |                     |
| 30–45 cm |                   | -0.49        | -0.33        | <b>1.25</b>  | <b>1.82</b>  |                     |
| 0–5 cm   |                   | -0.07        | 0.01         | 0.09         | -0.20        |                     |
| 0–15 cm  | drought           | -0.29        | -0.22        | -0.12        | <b>0.95</b>  | -0.19               |
| 15–30 cm |                   | -0.33        | 0.09         | <b>0.93</b>  | -0.49        |                     |
| 30–45 cm |                   | -0.39        | -0.63        | <b>-1.03</b> | 0.24         |                     |

Table S7. Effect of the treatments, F and P values from the mixed linear model

| variable              |                       | coefficient       | F-value    | P-value |
|-----------------------|-----------------------|-------------------|------------|---------|
| Tot C%                | Compost (control)     | -0.505312         | 3.92       | 0.04    |
|                       | Drought (drought)     | 0.012977          | 0.11       | 0.74    |
|                       | depth                 | -0.330701         | 381.34     | < 0.001 |
|                       | compost*drought       | -0.085369         | 0.09       | 0.75    |
|                       | compost*depth         | 0.076318          | 4.71       | 0.03    |
|                       | drought*depth         | -0.002850         | 0.07       | 0.78    |
|                       | compost*drought*depth | 0.001698          | 0.18       | 0.67    |
|                       | Soil C stock          | Compost (control) | -1.711e-01 | 2.55    |
| Drought (drought)     |                       | 1.367e-02         | 0.02       | 0.88    |
| depth                 |                       | -1.581e-01        | 318.82     | < 0.001 |
| compost*drought       |                       | -1.664e-03        | 0.45       | 0.49    |
| compost*depth         |                       | 2.477e-02         | 1.58       | 0.21    |
| drought*depth         |                       | -9.951e-03        | 0.75       | 0.38    |
| compost*drought*depth |                       | -3.883e-04        | 0.14       | 0.70    |
| Bulk Density          |                       | Compost (control) | 0.103812   | 4.43    |
|                       | Drought (drought)     | 0.004631          | 0.53       | 0.46    |
|                       | depth                 | 0.065142          | 133.90     | < 0.001 |
|                       | compost*drought       | 0.038799          | 0.01       | 0.91    |
|                       | compost*depth         | -0.023496         | 3.42       | 0.06    |
|                       | drought*depth         | -0.017299         | 2.60       | 0.10    |
|                       | compost*drought*depth | 0.011497          | 1.24       | 0.26    |
|                       | Root biomass          | Compost (control) | 0.205588   | 0.01    |
| Drought (drought)     |                       | 0.022839          | 0.26       | 0.60    |
| depth                 |                       | -0.607117         | 742.50     | < 0.001 |
| compost*drought       |                       | -0.178543         | 0.28       | 0.59    |
| compost*depth         |                       | -0.069662         | 0.03       | 0.84    |
| drought*depth         |                       | -0.002867         | 0.01       | 0.97    |
| compost*drought*depth |                       | 0.024838          | 0.51       | 0.47    |
| Root:shoot            |                       | Compost (control) | 0.343372   | 0.26    |
|                       | Drought (drought)     | 0.212338          | 1.44       | 0.23    |
|                       | depth                 | -0.616760         | 730.55     | < 0.001 |
|                       | compost*drought       | -0.262769         | 0.54       | 0.46    |
|                       | compost*depth         | -0.053439         | 0.04       | 0.84    |
|                       | drought*depth         | 0.006602          | 0.01       | 0.93    |
|                       | compost*drought*depth | -0.001445         | 0.20       | 0.65    |
|                       | Aboveground biomass   | Compost (control) | -146.010   | 43.47   |
| Drought (drought)     |                       | -160.656          | 61.29      | < 0.001 |
| compost*drought       |                       | 135.720           | 32.77      | < 0.001 |

Table S8. Spatial variability, F and P values from the mixed linear model

| <b>variable</b>         |                         | <b>coefficient</b>   | <b>F-value</b> | <b>P-value</b>   |
|-------------------------|-------------------------|----------------------|----------------|------------------|
| Tot C%                  | Grassland (Tovetorp)    | -0.74720             | 6.12           | <b>0.01</b>      |
|                         | catenary position (Low) | -0.04495             | 88.07          | <b>&lt; 0.01</b> |
|                         | depth                   | -0.34268             | 1031.73        | <b>&lt; 0.01</b> |
|                         | grass*cat pos           | 1.26078              | 43.19          | <b>&lt; 0.01</b> |
|                         | grass*depth             | 0.12659              | 42.61          | <b>&lt; 0.01</b> |
|                         | cat pos*depth           | 0.04961              | 2.44           | 0.12             |
|                         | grass*cat pos*depth     | -0.08199             | 3.85           | <b>0.04</b>      |
|                         | Soil C stock            | Grassland (Tovetorp) | -0.15975       | 3.80             |
| catenary position (Low) |                         | 0.16169              | 59.62          | <b>&lt; 0.01</b> |
| depth                   |                         | -0.16568             | 697.73         | <b>&lt; 0.01</b> |
| grass*cat pos           |                         | 0.28128              | 9.98           | <b>&lt; 0.01</b> |
| grass*depth             |                         | 0.04597              | 44.45          | <b>&lt; 0.01</b> |
| cat pos*depth           |                         | 0.01387              | 0.28           | 0.59             |
| grass*cat pos*depth     |                         | 0.01279              | 0.75           | 0.38             |
| Bulk Density            |                         | Grassland (Tovetorp) | 0.253719       | 5.82             |
|                         | catenary position (Low) | 0.166079             | 16.51          | <b>&lt; 0.01</b> |
|                         | depth                   | 0.061534             | 261.30         | <b>&lt; 0.01</b> |
|                         | grass*cat pos           | -0.393454            | 44.24          | <b>&lt; 0.01</b> |
|                         | grass*depth             | -0.026164            | 4.00           | <b>0.04</b>      |
|                         | cat pos*depth           | -0.018662            | 4.60           | <b>0.03</b>      |
|                         | grass*cat pos*depth     | 0.034814             | 10.94          | <b>&lt; 0.01</b> |
|                         | Root biomass            | Grassland (Tovetorp) | 97.60          | 0.72             |
| catenary position (Low) |                         | 107.19               | 3.89           | <b>0.04</b>      |
| depth                   |                         | -50.41               | 581.87         | <b>&lt; 0.01</b> |
| grass*cat pos           |                         | 213.00               | 5.61           | <b>0.02</b>      |
| grass*depth             |                         | -16.30               | 1.83           | 0.17             |
| cat pos*depth           |                         | -12.29               | 12.94          | <b>&lt; 0.01</b> |
| grass*cat pos*depth     |                         | -34.77               | 0.04           | 0.83             |
| Root:shoot              |                         | Grassland (Tovetorp) | 0.02614        | 0.42             |
|                         | catenary position (Low) | 0.09763              | 3.96           | <b>0.04</b>      |
|                         | depth                   | -0.70420             | 748.09         | <b>&lt; 0.01</b> |
|                         | grass*cat pos           | 0.01363              | 1.26           | 0.26             |
|                         | grass*depth             | -0.05263             | 2.60           | 0.11             |
|                         | cat pos*depth           | 0.22429              | 12.17          | <b>&lt; 0.01</b> |
|                         | grass*cat pos*depth     | -0.01548             | 0.49           | 0.48             |
|                         | Aboveground biomass     | Grassland (Tovetorp) | -79.730        | 9.58             |
| catenary position (Low) |                         | -147.158             | 0.24           | 0.62             |
| grass*cat pos           |                         | 319.817              | 38.14          | <b>&lt; 0.01</b> |

Table S9. Temporal variability, F and P values from the mixed linear model

| <b>variable</b>     |             | <b>coefficient</b> | <b>F-value</b> | <b>P-value</b> |
|---------------------|-------------|--------------------|----------------|----------------|
| Tot C%              | Year (2022) | 0.03766            | 12.22          | < 0.01         |
|                     | depth       | -0.25696           | 969.92         | < 0.01         |
|                     | year*depth  | -0.03626           | 0.79           | 0.37           |
| Soil C stock        | Year (2022) | 0.138012           | 5.00           | 0.02           |
|                     | depth       | -0.114506          | 659.01         | < 0.01         |
|                     | year*depth  | -0.036145          | 0.001          | 0.96           |
| Bulk Density        | Year (2022) | 7.962e-02          | 6.83           | < 0.01         |
|                     | depth       | 4.808e-02          | 254.08         | < 0.01         |
|                     | year*depth  | -5.085e-04         | 0.27           | 0.59           |
| Root biomass        | Year (2022) | 0.33963            | 7.27           | < 0.01         |
|                     | depth       | -0.60590           | 581.70         | < 0.01         |
|                     | year*depth  | -0.03090           | 9.13           | < 0.01         |
| Root:shoot          | Year (2022) | -0.16514           | 22.62          | < 0.01         |
|                     | depth       | -0.61237           | 575.76         | < 0.01         |
|                     | year*depth  | -0.02721           | 8.99           | < 0.01         |
| Aboveground biomass | Year (2022) | 258.223            | 102.75         | < 0.01         |

## Figures

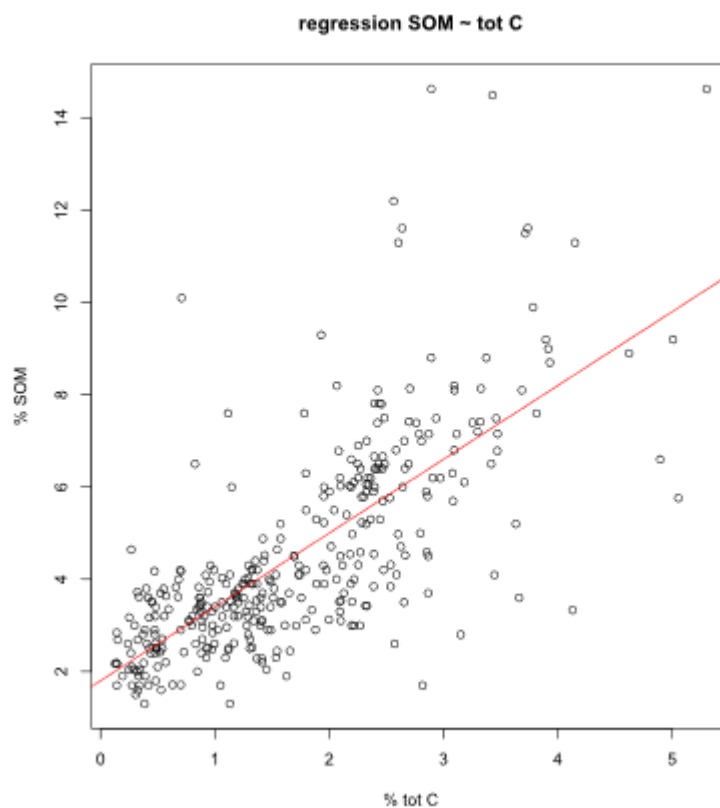

*Fig S1. Regression plot SOM ~ tot C in the study system.*

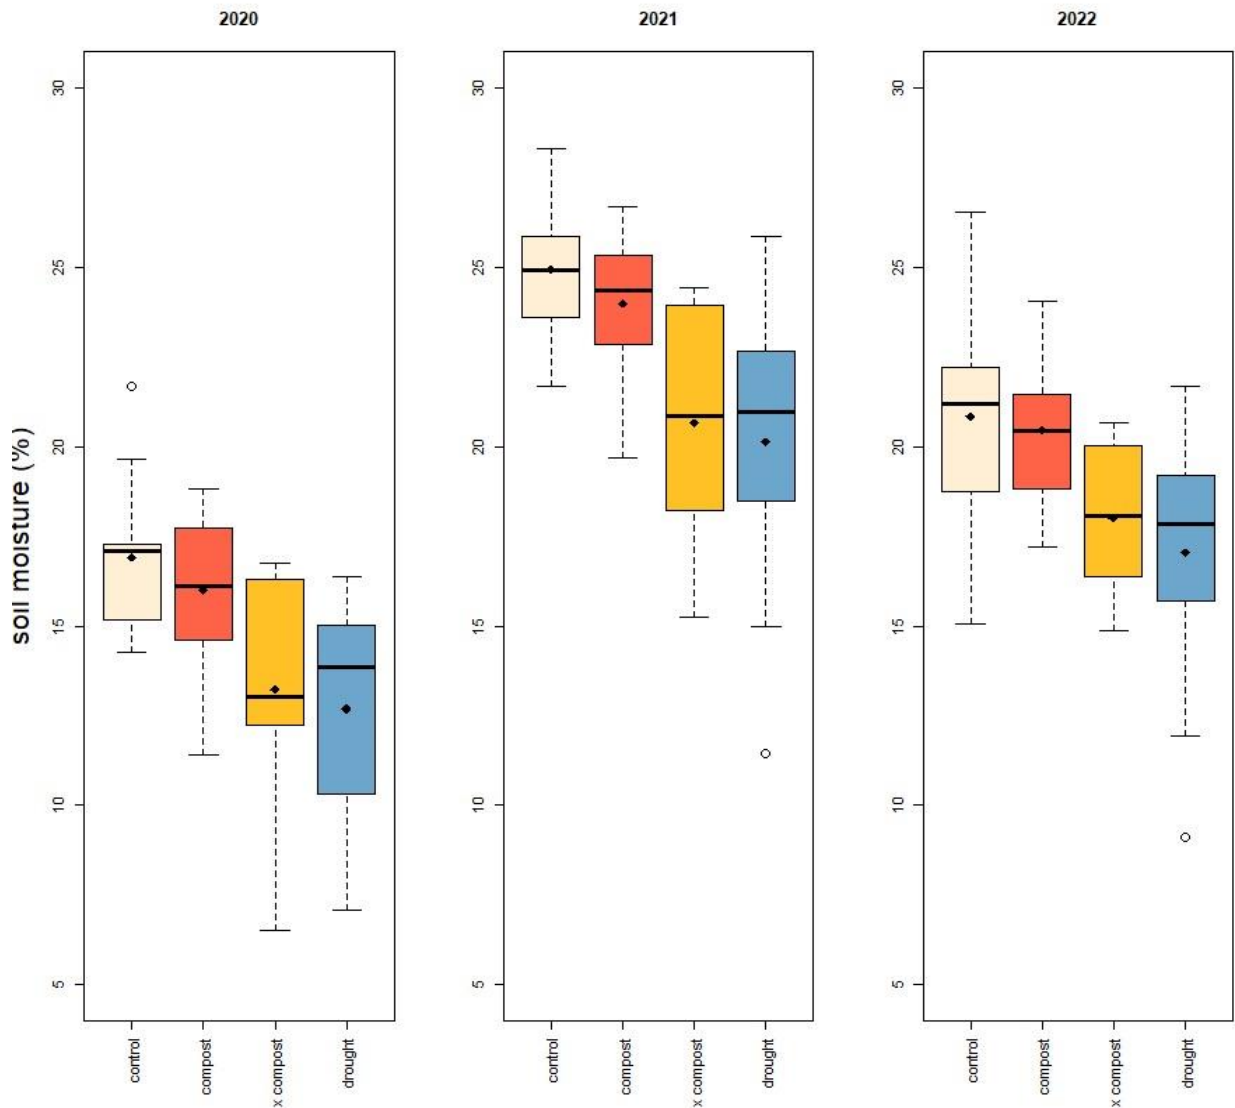

Fig. S2. Growing season (April through August) average values of volumetric soil moisture (%) in the 0-30 cm soil depth for each treatment (colored boxes), for 2020, 2021 and 2022. Values are means for all sites ( $n = 12$ ). White = control, red = compost, yellow = compost  $\times$  drought, blue = drought. Boxes show mean (dot inside the box), median (horizontal line) and interquartile range (IQR, colored box); whiskers extend to  $1.5 \times \text{IQR}$ ; empty dots in the graph are outliers.

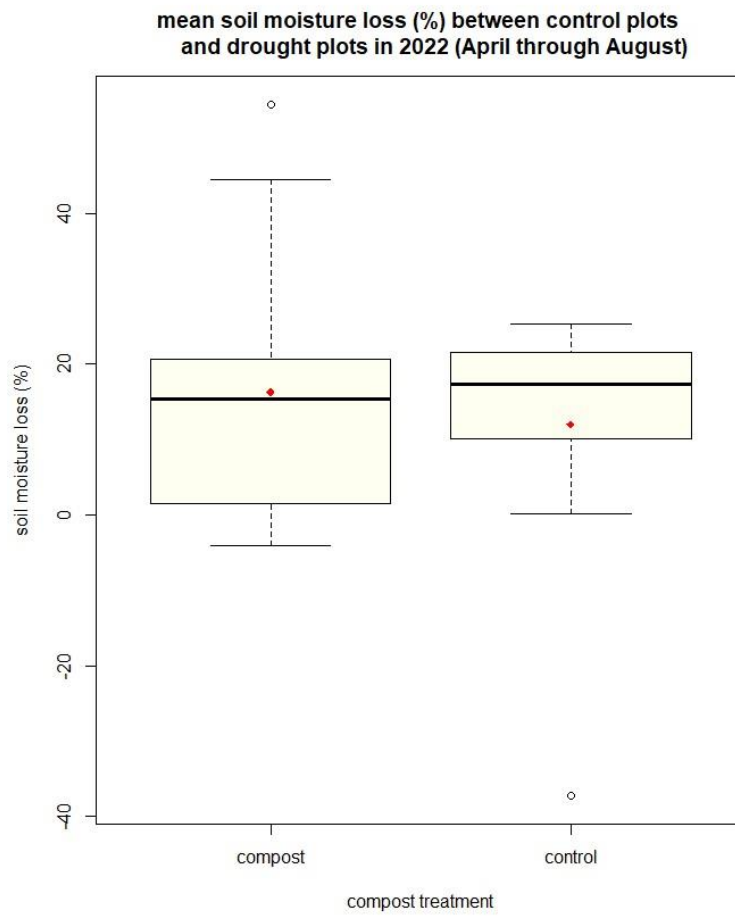

*Fig. S3. Growing season (April through August) average values of volumetric soil moisture loss (%) (difference between drought plots and control plots) in the 0-30 cm soil depth in compost-treated plots and untreated plots. Values are means for all sites ( $n = 12$ ). Boxes show mean (red dot inside the box), median (horizontal line) and interquartile range (IQR, colored box); whiskers extend to  $1.5 \times IQR$ ; empty dots in the graph are outliers.*

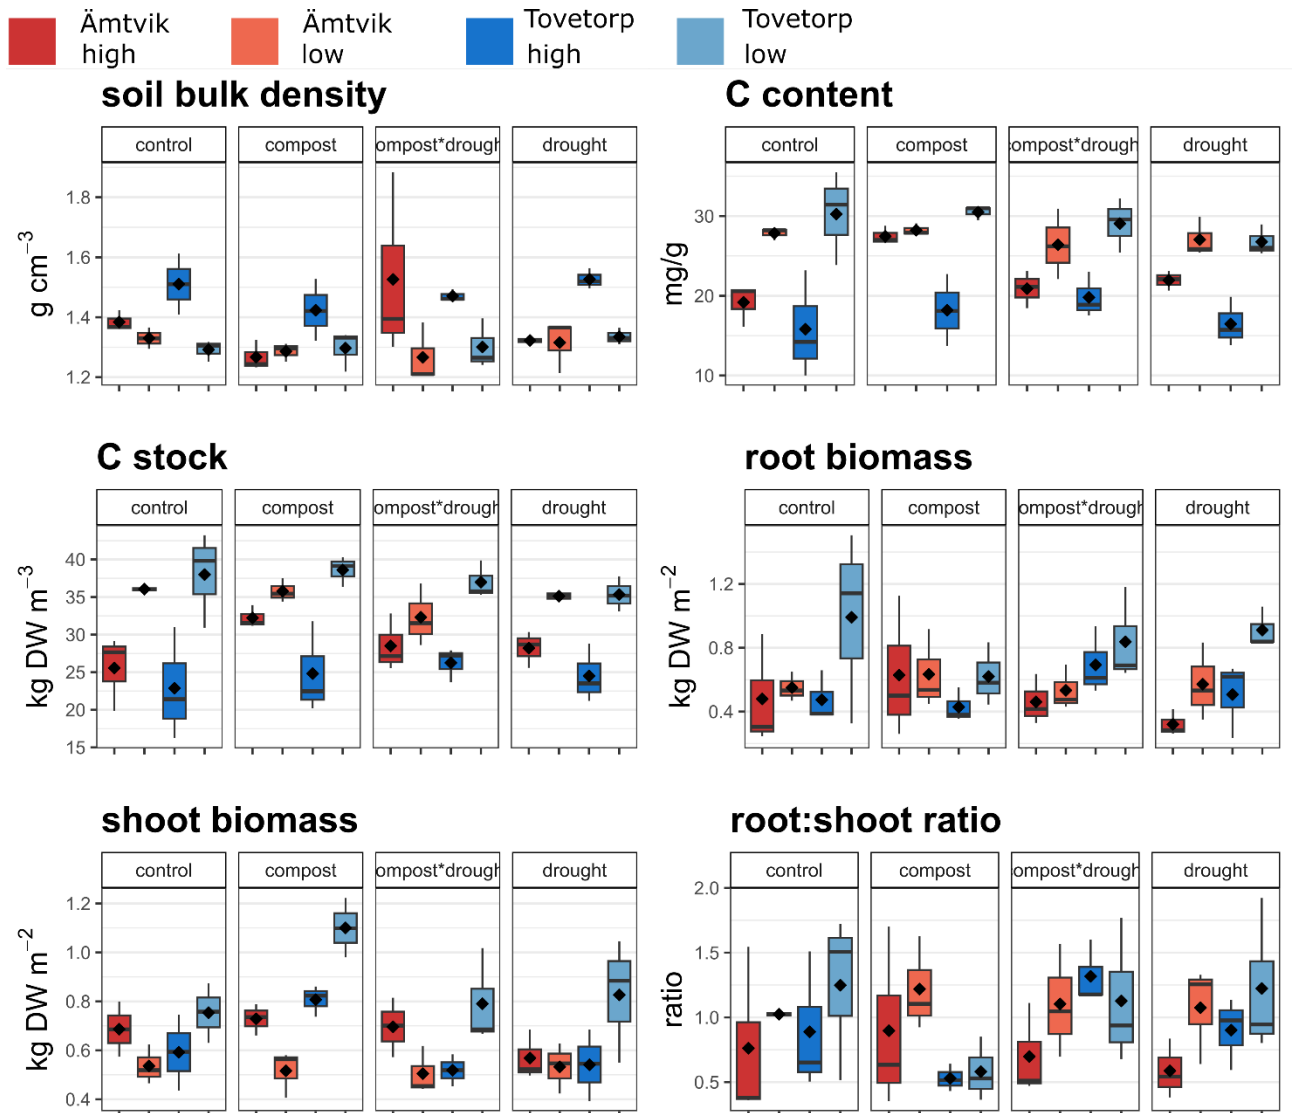

Fig. S4. Values of soil bulk density, soil carbon (C) content, soil C stocks, root biomass, shoot biomass and root-shoot ratio, at 0-15 cm depth at each site (colors) and for each treatment (control, compost, compost x drought, drought) in 2022 ( $n = 3$ ). Red = Ämtvik High elevation, orange = Ämtvik Low elevation, blue = Tovetorp High elevation, light blue = Tovetorp Low elevation. Boxes show mean (diamond inside the box), median (horizontal line) and interquartile range (IQR, colored box); whiskers extend to  $1.5 \times IQR$ ; dots outside of the boxes are outliers.



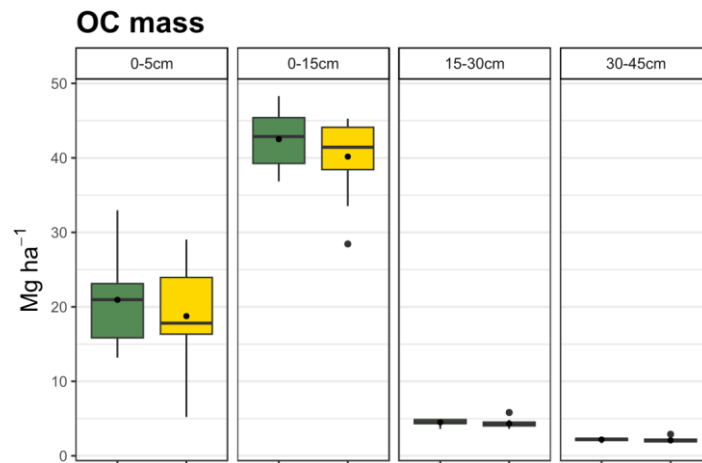

Fig. S5. Values organic carbon (OC) mass at different sampling depths in 2019 and 2022 (control plots,  $n = 12$ ). Values are means for all plots. Green = 2019, yellow = 2022. The calculation was based on equivalent soil mass method. Boxes show mean (dot inside the box), median (horizontal line) and interquartile range (IQR, colored box); whiskers extend to  $1.5 \times \text{IQR}$ ; dots in the graph are outliers.
